# Supplementary material for: The Chinese Herbal Formula PAPZ Ameliorates Behavioral Abnormalities in Depressive Mice
Source: MDPI journal article supplement (doi:10.3390/nu11040859), 2019-04-16
Supplement: s1 [file s1]

**Table S1.** Effects of different concentrations of CHF<sub>s</sub> on CORT-induced HT22 cell viability determined by CCK-8 assay.

| CHF <sub>s</sub> Code | CORT                         | Concentration of CHF <sub>s</sub> (mg/mL) |                               |                               |                               |
|-----------------------|------------------------------|-------------------------------------------|-------------------------------|-------------------------------|-------------------------------|
|                       |                              | 0.5                                       | 5                             | 10                            | 50                            |
| WXJ-17-001            | 74.2% ± 8.4% <sup>###</sup>  | 75.3% ± 12.9%                             | 109.7% ± 24.7% <sup>***</sup> | 133.4% ± 21.7% <sup>***</sup> | 2.1% ± 1.4% <sup>***</sup>    |
| WXJ-17-002            | 73.6% ± 7.2% <sup>###</sup>  | 82.2% ± 8.9% <sup>**</sup>                | 114.4% ± 15.6% <sup>***</sup> | 115% ± 14.6% <sup>***</sup>   | 21.6% ± 8.4% <sup>***</sup>   |
| WXJ-17-003            | 80.1% ± 16.9% <sup>###</sup> | 106.8% ± 11.8% <sup>***</sup>             | 111.3% ± 26.1% <sup>***</sup> | 26.1% ± 19.0% <sup>***</sup>  | 5.3% ± 1.6% <sup>***</sup>    |
| WXJ-17-004            | 75.0% ± 8.3% <sup>###</sup>  | 71.7% ± 9.4%                              | 93.7% ± 15.3% <sup>***</sup>  | 105.1% ± 22.2% <sup>***</sup> | 101.1% ± 31.2% <sup>***</sup> |
| WXJ-17-005            | 70.3% ± 6.9% <sup>###</sup>  | 71.0% ± 7.0%                              | 104.6% ± 21.9% <sup>***</sup> | 69.3% ± 20.5%                 | 6.3% ± 0.9% <sup>***</sup>    |
| WXJ-17-006            | 70.2% ± 8.7% <sup>###</sup>  | 75.2% ± 7.8%                              | 99.7% ± 12.7% <sup>***</sup>  | 104.1% ± 27.7% <sup>***</sup> | 15.9% ± 10.0% <sup>***</sup>  |
| WXJ-17-007            | 69.7% ± 10.9% <sup>###</sup> | 73.0% ± 10.9%                             | 101.4% ± 18.5% <sup>***</sup> | 99.1% ± 32.7% <sup>***</sup>  | 4.5% ± 2.1% <sup>***</sup>    |
| WXJ-17-008            | 74.0% ± 8.7% <sup>###</sup>  | 81.2% ± 13.1%                             | 96.6% ± 28.3% <sup>**</sup>   | 57.5% ± 31.1% <sup>*</sup>    | 3.9% ± 1.5% <sup>***</sup>    |
| WXJ-17-009            | 69.2% ± 7.6% <sup>###</sup>  | 76.2% ± 5.2% <sup>*</sup>                 | 87.7% ± 12.9% <sup>***</sup>  | 94.4% ± 14.9% <sup>***</sup>  | 5.9% ± 3.5% <sup>***</sup>    |
| WXJ-17-010            | 73.0% ± 5.4% <sup>###</sup>  | 87.0% ± 5.7% <sup>***</sup>               | 73.1% ± 11.2%                 | 24.4% ± 17.4% <sup>***</sup>  | 4.8% ± 1.5% <sup>***</sup>    |
| WXJ-17-011            | 75.5% ± 10.4% <sup>###</sup> | 75.3% ± 12.0%                             | 91.9% ± 25.9% <sup>*</sup>    | 86.2% ± 34.2%                 | 1.9% ± 0.9% <sup>***</sup>    |
| WXJ-17-012            | 76.1% ± 11.2% <sup>###</sup> | 80.8% ± 23.2%                             | 50.1% ± 22% <sup>***</sup>    | 14.6% ± 5.1% <sup>***</sup>   | 4.9% ± 1.0% <sup>***</sup>    |
| WXJ-17-013            | 72.0% ± 6.4% <sup>###</sup>  | 76.7% ± 12.1%                             | 77.7% ± 15.6%                 | 24.7% ± 27.9% <sup>***</sup>  | 2.0% ± 0.6% <sup>***</sup>    |
| WXJ-17-014            | 72.0% ± 7.5% <sup>###</sup>  | 64.4% ± 8.9% <sup>**</sup>                | 77.0% ± 17.0%                 | 70.6% ± 25.1%                 | 2.3% ± 1.2% <sup>***</sup>    |
| WXJ-17-015            | 69.2% ± 7.6% <sup>###</sup>  | 60.7% ± 15.8% <sup>*</sup>                | 56.0% ± 17.8% <sup>**</sup>   | 19.4% ± 9.5% <sup>***</sup>   | 2.7% ± 1.3% <sup>***</sup>    |
| WXJ-17-016            | 70.5% ± 9.7% <sup>###</sup>  | 64.4% ± 11.2%                             | 33.9% ± 6.6% <sup>***</sup>   | 10.5% ± 4.1% <sup>***</sup>   | 3.8% ± 1.2% <sup>***</sup>    |
| WXJ-17-017            | 78.2% ± 11.4% <sup>###</sup> | 81.2% ± 8.2%                              | 90.9% ± 14.1% <sup>**</sup>   | 24.6% ± 10.0% <sup>***</sup>  | 2.1% ± 0.7% <sup>***</sup>    |
| WXJ-17-018            | 76.4% ± 12.8% <sup>###</sup> | 79.6% ± 10.7%                             | 84.2% ± 11.2%                 | 50.8% ± 39.1% <sup>**</sup>   | 1.2% ± 0.7% <sup>***</sup>    |
| WXJ-17-019            | 78.6% ± 11.2% <sup>###</sup> | 79.4% ± 11.1%                             | 81.4% ± 10.5%                 | 78.4% ± 14.1%                 | 37.5% ± 18.6% <sup>***</sup>  |
| WXJ-17-020            | 75.4% ± 12.2% <sup>###</sup> | 71.3% ± 11.0%                             | 75.9% ± 12.3%                 | 71.0% ± 16.1%                 | 67.1% ± 23.8%                 |
| WXJ-17-021            | 75.5% ± 10.3% <sup>###</sup> | 69.8% ± 9.2%                              | 71.4% ± 12.8%                 | 66.7% ± 15.1% <sup>*</sup>    | 43.8% ± 13.9% <sup>***</sup>  |
| WXJ-17-022            | 78.2% ± 11.4% <sup>###</sup> | 81.2% ± 8.2%                              | 90.9% ± 14.1% <sup>**</sup>   | 24.6% ± 10.0% <sup>***</sup>  | 2.1% ± 0.7% <sup>***</sup>    |

CHF<sub>s</sub>, Chinese herbal formulas; CORT, corticosterone; cell counting kit-8, CCK-8; <sup>###</sup>*p* < 0.001, compared with the control group (the cell viability of control group was 100%); <sup>\*</sup>*p* < 0.05, <sup>\*\*</sup>*p* < 0.01, <sup>\*\*\*</sup>*p* < 0.001, compared with the CORT group.

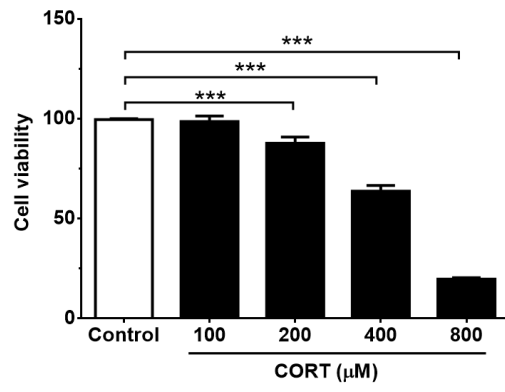

**Figure S1.** Effects of different concentrations of corticosterone (CORT) on TH22 cell viability determined by cell counting kit-8 assay. \*\*\* $p < 0.001$ , compared with the control group.
